# Supplementary material
Source: PubMed Central journal article supplement (PMC3529012)
Supplement: 1202906109_pnas.201202906SI.pdf [file 1202906109_pnas.201202906SI.pdf]

# Supporting Information

Pamplona et al. 10.1073/pnas.1202906109

## SI Materials and Methods

**Mouse Strains.** Swiss albino mice were provided by the animal facility of Universidade Federal de Santa Catarina; inbred C57BL/6 mice were provided by Charles River; CB<sub>1</sub> knockout (CB<sub>1</sub><sup>-/-</sup>) and control (CB<sup>+/+</sup>) adult male mice were developed in the Max Planck Institute of Psychiatry and raised in-house (1); and 5-LOX knockouts were provided by Fundação Osvaldo Cruz and kept in the animal facilities of Universidade Federal do Rio de Janeiro. Adult male mice with ad libitum food and water were used throughout the study and tested during the light phase of the light cycle.

**Behavioral Tests.** The tetrad test has been classically used to evaluate cannabinoid effects (2). Locomotion in the open field was evaluated in a squared arena (30 × 30 × 15 cm) for 5 min; the bar catalepsy test consisted of evaluating the time spent in an upright position with the forepaws supported by a 5-cm high horizontal bar (maximum 300 s). Body temperature was assessed with a digital thermometer attached to a rectal probe; nociception was assessed by placing the mice on a heated surface (hot plate at 55 ± 0.5 °C) until forepaw licking occurred (nociceptive latency). Independent groups of animals were used for each test. Water maze training was carried out in 10 consecutive trials (maximum 60 s), followed by a 60-s probe trial of spatial memory performed 24 h after training. For a complete description of water maze procedure, see ref. 3.

**CB<sub>1</sub> Receptor Binding.** Competitive binding assays were performed using mouse whole-brain membranes (4). Lipoxin A<sub>4</sub> (LXA<sub>4</sub>) (1 nM–10 μM) was incubated with membranes in assay buffer (50 mM Tris-HCl, 1 mM EDTA, 3 mM MgCl<sub>2</sub>, 1 mg/mL BSA, 100 μM PMSF, pH 7.4) for 1 h at 37 °C with 0.5 nM of [<sup>3</sup>H]SR141716A. To investigate the impact of LXA<sub>4</sub> on anandamide (AEA) binding, LXA<sub>4</sub> (100 nM) or control (ethanol 0.5%) were incubated together with increasing concentrations of AEA (1 nM–10 μM) strictly following the same conditions described. The results were confirmed by the investigation of the effects of LXA<sub>4</sub> (1 nM–1 μM) in the binding of the cannabinoid agonist [<sup>3</sup>H]CP55914 and [<sup>3</sup>H]WIN55212-2 in mouse whole-brain membranes. Dissociation binding was performed by the displacement of the CB<sub>1</sub> ligand [<sup>3</sup>H]CP55914 (0.5 nM) by an excess of the agonist WIN55212-2 (1 μM) in the presence of LXA<sub>4</sub> (100 nM) or control (ethanol 0.5%). The kinetics of this reaction was followed by 120 min, during which aliquots were sampled over time. The reaction was terminated by filtration through GF/B filters, and the membrane-bound radioactivity was measured in a liquid scintillation counter. Nonspecific binding was calculated with 10 μM WIN55212-2.

**Fatty Acid Amide Hydrolase and Monoacyl Glycerol Lipase Enzymatic Activity.** The enzymatic assays were conducted in mouse whole-brain homogenates as previously described (5). LXA<sub>4</sub> (up to 10 μM) was incubated with the membrane fraction of the homogenate (100 μg of protein) with [<sup>14</sup>C]AEA (1.8 μM; 5 mCi/mmol) (50 mM Tris-HCl, pH 9) for 30 min at 37 °C for fatty acid amide hydrolase and with the cytosolic fraction of the homogenate (100 μg of protein) with [<sup>3</sup>H]2-arachidonoylglycerol (2-AG) (25 μM; 1 mCi/mmol) (50 mM Tris-HCl, pH 7) for 20 min at 37 °C for monoacyl glycerol lipase. The enzymatic activity was determined by the generation of the respective metabolite of AEA ([<sup>14</sup>C]ethanolamine) or 2-AG ([<sup>3</sup>H]glycerol) and normalized by the mass of fresh tissue.

**Quantification of Endocannabinoid Levels.** The levels of AEA and 2-AG in the brain (cortex, hippocampus, cerebellum) were quantified ex vivo after LXA<sub>4</sub> [1 pmol/2 μL, intracerebroventricularly (i.c.v.)] or control (ethanol 0.5% in PBS) injection, as previously described (6). The tissue was homogenized (50 mM Tris-HCl, pH 7.5) and extracted with 2 volumes of chloroform/methanol (2:1) containing 5 pmol of the internal standards d<sub>4</sub>-AEA and d<sub>5</sub>-2-AG and prepurified. The HPLC measurement was performed with a reversed-phase C18 column coupled to an MS. AEA and 2-AG were eluted with methanol/water/acetic acid (85:15:0.2) and a flow rate of 1 mL/min at 25 °C. Retention times were 14.5 min for AEA and 17 min for 2-AG (*m/z* tracking at 400 °C ionization temperature). Endocannabinoid levels were normalized by the mass of fresh tissue.

**Forskolin-Induced cAMP Accumulation in CB<sub>1</sub>-Transfected Cells.** HEK293T cells plated on 35-mm culture dishes were transfected with 2 μg of murine CB<sub>1</sub> cDNA using Lipofectamine 2000 (Invitrogen). After 48 h in regular MEM cell culture media, they were incubated with Hepes 5 mM buffered MEM and 1 mg/mL BSA, with 200 μM 3-isobutyl-1-methylxanthine (IBMX). Drugs were preincubated with the HEK cells for 10 min, and 1 μM forskolin (FSK) was added to the media and incubated for 10 min. The reaction was stopped by aspiration of the cell culture media, followed by the addition 100 μL of 0.1 N HCl. The cAMP content in the supernatant was acetylated and measured by ELISA according to the kit instructions (Cayman).

**Agonist-Stimulated [<sup>35</sup>S]GTPγS Binding.** G-protein activation was measured by agonist-stimulated [<sup>35</sup>S]GTPγS-binding assay, as previously described (7). Membranes have been incubated with 0.05 nM [<sup>35</sup>S]GTPγS (1,250 Ci/mmol) in assay buffer containing 30 μM GDP and 0.5% fatty acid-free BSA. HU-210, AEA, and/or LXA<sub>4</sub> (1 nM–100 μM) were added to the membranes and incubated for 50 min at 30 °C. Nonspecific binding was determined in the presence of 10 μM GTPγS. The reaction was terminated by filtration through GF/B filters, and the membrane-bound radioactivity was measured in a liquid scintillation counter.

**Immunodetection of LXA<sub>4</sub> Levels in the Brain.** Brains from Swiss mice were harvested and dissected (hippocampus, cortex, cerebellum), lipid was extracted with ethanol (5 μL/mg of wet tissue) and centrifuged for 5 min at 10,000 × *g*, and the supernatant was applied to preactivated Sep-Pak C18 columns. LXA<sub>4</sub> was eluted using the mobile phase of decreasing polarity (water:hexane:ethyl formate) at 1 mL/min. The extracts were then applied into a double-sandwich ELISA kit, read at 650 nm and normalized by wet tissue weight (g).

**Real-Time PCR for ALX Receptors.** The presence of ALX receptors in the brain (cortex, hippocampus, cerebellum) was ruled out with real-time PCR (in comparison with RNA from spleen and lung). Total RNA (300 ng) was used for cDNA synthesis using the standard reverse transcriptase protocol, and the cDNA was amplified in duplicate using TaqMan Universal PCR Master Mix Kit with specific TaqMan Gene Expression target genes, the 3' quencher Minor groove binder (MGB) and 6-carboxyfluorescein (FAM)-labeled probe for mouse FPR2 (Mm00484464\_s1), and the 3' quencher MGB and 2'-chloro-7'-phenyl-1,4-dichloro-6-carboxyfluorescein (VIC)-labeled probe for mouse GAPDH (NM\_008084.2, internal control for normalization). Thermocycling parameters were 50 °C for 2 min, 95 °C for 10 min, 50 cycles of 95 °C for 15 s, and 60 °C for 1 min.

**In Vitro Electrophysiology of CB<sub>1</sub> Receptors.** The confirmation that LXA<sub>4</sub>-induced potentiation of AEA effects occurred at the level of the CB<sub>1</sub> receptor protein was studied with in vitro electrophysiology using the heterologous expression of CB<sub>1</sub> receptors on *Xenopus* oocytes. The cRNA of CB<sub>1</sub> receptors in combination with the cRNA of G-protein-gated K<sup>+</sup> channels (Kir 3.1 and Kir 3.4), obtained by in vitro transcription (mMessage machine, Ambion), was injected into oocytes (total 1.5 ng of RNA in 50 nL of injection). The oocytes were surgically obtained from female *Xenopus*, defolliculated, and maintained in ND-96 (in mM: 96 NaCl; 2 KCl; 1.8 CaCl<sub>2</sub>; 1 MgCl<sub>2</sub>; 5 Hepes) supplemented with 40 mg/mL gentamicin, at 17 °C until use, as described before (8). Electrophysiological recording initiated 5–7 d after cRNA injection and was performed as described elsewhere (9). The oocytes were placed in a rectangular recording chamber (100 μL volume) and continuously perfused at a rate of 2 mL·min<sup>-1</sup> with a solution containing (in mM) 70 KCl, 20 NaCl, 3 MgCl<sub>2</sub>, 5 Hepes, pH 7.4 (2 mL/min, room temperature) and impaled with two glass microelectrodes (0.5–2 MΩ) filled with 3 M KCl and voltage-

clamped at 70 mV for current recording. Measurements were obtained before (basal) and after drug administration.

**Statistical Analysis.** Data are expressed as mean ± SEM, with the number of experimental subjects expressed between brackets (*n*). The results have been analyzed by one- or two-way analysis of variance (ANOVA), using treatment, pretreatment, strain, or time as independent variables, depending on the experimental design. Successful ANOVAs were followed by point-by-point analysis by Duncan's post hoc test. Water maze test data were analyzed by planned comparisons of least square means of meaningful groups. Two-tailed Student's *t* test was used for two-group comparisons. The competitive binding assays were analyzed by nonlinear curve fitting for one or two sites of interaction. The analyses are expressed in each figure legend. The minimum levels of significance accepted for all tests was *P* < 0.05. Statistical comparisons were done using the package Statistica 7 (StatSoft Inc.).

- Marsicano G, et al. (2002) The endogenous cannabinoid system controls extinction of aversive memories. *Nature* 418(6897):530–534.
- Howlett AC, et al. (2002) International Union of Pharmacology. XXVII. Classification of cannabinoid receptors. *Pharmacol Rev* 54(2):161–202.
- Pamplona FA, Pandolfo P, Duarte FS, Takahashi RN, Prediger RD (2010) Altered emotionality leads to increased pain tolerance in amyloid beta (Aβ<sub>1-40</sub>) peptide-treated mice. *Behav Brain Res* 212(1):96–102.
- Abood ME, Ditto KE, Noel MA, Showalter VM, Tao Q (1997) Isolation and expression of a mouse CB<sub>1</sub> cannabinoid receptor gene. Comparison of binding properties with those of native CB<sub>1</sub> receptors in mouse brain and N18TG2 neuroblastoma cells. *Biochem Pharmacol* 53(2):207–214.
- Bisogno T, et al. (2006) Development of the first potent and specific inhibitors of endocannabinoid biosynthesis. *Biochim Biophys Acta* 1761(2):205–212.
- Di Marzo V, et al. (2000) Levels, metabolism, and pharmacological activity of anandamide in CB(1) cannabinoid receptor knockout mice: Evidence for non-CB(1), non-CB(2) receptor-mediated actions of anandamide in mouse brain. *J Neurochem* 75(6):2434–2444.
- Massa F, et al. (2010) Alterations in the hippocampal endocannabinoid system in diet-induced obese mice. *J Neurosci* 30(18):6273–6281.
- Tributino JL, et al. (2010) LASSBio-881: An N-acylhydrazone transient receptor potential vanilloid subfamily type 1 antagonist orally effective against the hypernociception induced by capsaicin or partial sciatic ligation. *Br J Pharmacol* 159(8):1716–1723.
- Sanna E, Garau F, Harris RA (1995) Novel properties of homomeric beta 1 gamma-aminobutyric acid type A receptors: Actions of the anesthetics propofol and pentobarbital. *Mol Pharmacol* 47(2):213–217.

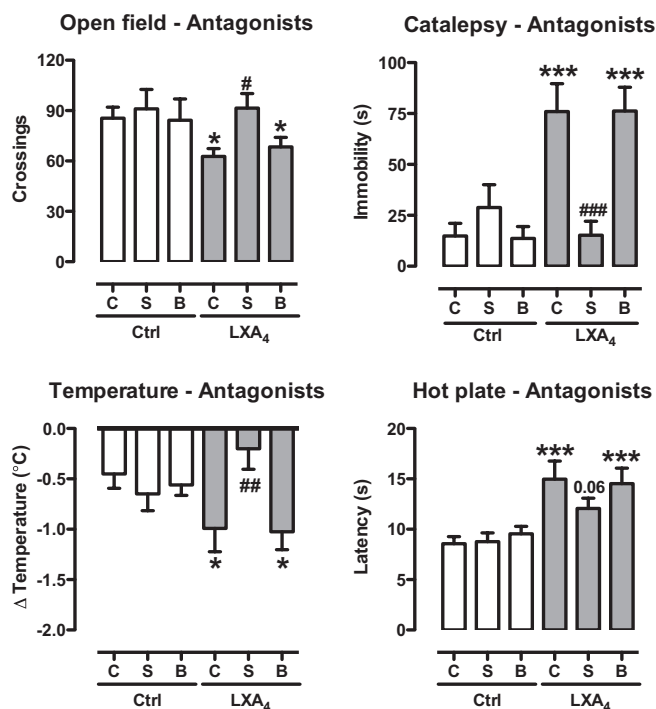

**Fig. S1.** LXA<sub>4</sub> displays CB<sub>1</sub>-dependent cannabimimetic effects in the brain. Lipoxin A<sub>4</sub> (LXA<sub>4</sub> 0.01–1 pmol/5 μL, i.c.v.) or control (Ctrl) were injected in Swiss mice 5 min before the cannabinoid tetrad test (locomotion in the open field, catalepsy, body temperature, nociception in the hot plate). The CB<sub>1</sub> antagonist SR141716A (S; 1 mg/kg, i.p.), the ALX antagonist BOC-2 (B; 10 μg/kg, i.p.), or control (C) were injected 50 min before LXA<sub>4</sub> (1 pmol/5 μL, i.c.v.) or control (Ctrl). Lipoxin induced the full pattern of cannabimimetic effects in the cannabinoid tetrad test, effects that were prevented by the CB<sub>1</sub> antagonist SR141716A. Data are represented as mean ± SEM. \**P* < 0.05, \*\*\**P* < 0.001 vs. Control #*P* < 0.05, ###*P* < 0.001 vs. LXA<sub>4</sub> (Duncan's post hoc).

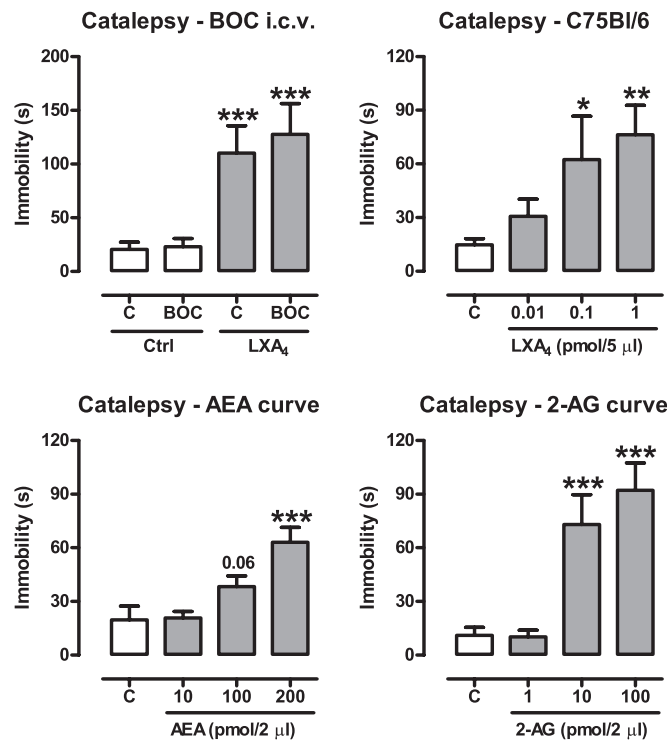

**Fig. S2.** Additional control experiments of catalepsy. (*Upper Left*) The ALX antagonist BOC-2 (B; 1,000 pmol/2  $\mu$ L, i.c.v.) was coinjected with LXA<sub>4</sub> (1 pmol/2  $\mu$ L, i.c.v.) or control (Ctrl) and tested in the catalepsy test 5 min later to confirm that LXA<sub>4</sub>-induced catalepsy does not depend on ALX receptors, regardless of the BOC administration route. (*Upper Right*) LX<sub>4</sub> also induces catalepsy in C57BL/6 inbred mice. This dose-response curve was performed to confirm the dose for the experiment with CB1 knockout mice, which have been bred under the C5Bl/6 genetic background (Fig. 2). (*Lower panels*) Dose-response curve for the cataleptic effects of AEA and 2-AG via i.c.v. route. This experiment defined the subdoses of AEA and 2-AG that were used to investigate whether LX<sub>4</sub> would potentiate the effects of these molecules (Fig. 3). Data are represented as mean  $\pm$  SEM. \* $P$  < 0.05, \*\* $P$  < 0.01, \*\*\* $P$  < 0.001 vs. Control (Duncan's post hoc).

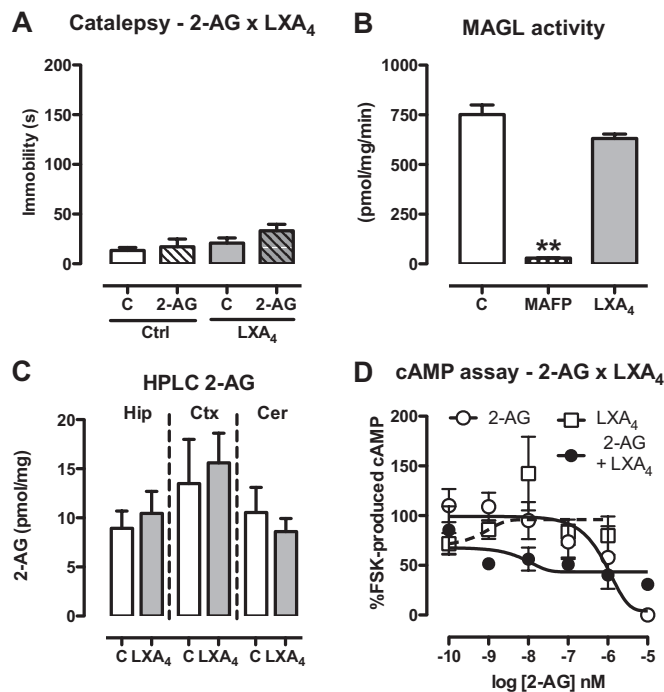

**Fig. 53.** LXA<sub>4</sub> do not potentiate 2-AG effects. (A) Selected pre-effective dose of 2-AG (1 pmol/2  $\mu$ L, i.c.v.) was coinjected with LXA<sub>4</sub> (0.01 pmol/2  $\mu$ L, i.c.v.) 5 min before the bar catalepsy test. LXA<sub>4</sub> did not interact with 2-AG [ $F(3,27) = 2.37, P = 0.09, n = 7-9/\text{group}$ ]. (B) Activity of the 2-AG-degrading enzyme MGL was measured in the presence of LXA<sub>4</sub> (100 nM–10  $\mu$ M) using [<sup>3</sup>H]2-AG (25  $\mu$ M) as substrate for monoacylglycerol lipase (MGL). Methyl arachidonyl fluorophosphate (MAFP) (500 nM) was the enzymatic inhibitor used as positive control. LXA<sub>4</sub> did not interfere with MGL ( $t = 2.26, P = 0.15, n = 3/\text{group}$ ) activity, as opposed to the positive control MAFP ( $t = 14.96, P < 0.01$ ). (C) 2-AG levels in brain tissues were assessed by HPLC-MS 5 min after injection of LXA<sub>4</sub> (1 pmol/2  $\mu$ L, i.c.v.) or control (C). There were no sign of treatment-related alterations of endocannabinoid content in the hippocampus (Hip), cortex (Ctx), or cerebellum (Cer) ( $n = 6/\text{group}$ ). (D) cAMP production in response to FSK stimulation was investigated in HEK cells transfected with murine CB<sub>1</sub> receptors. Cells were incubated with 2-AG (0.1 nM–10  $\mu$ M), LXA<sub>4</sub> (0.1 nM–1  $\mu$ M), or 2-AG + LXA<sub>4</sub> (100 nM) and stimulated for 10 min with FSK for evaluation of the intracellular content of cAMP. LXA<sub>4</sub> did not influence cAMP levels by itself and apparently reduced 2-AG efficacy. Efficacy curves were generated by nonlinear regression (curve fitting). Data are represented as mean  $\pm$  SEM. \* $P < 0.05, **P < 0.01$  vs. Control (Duncan's post hoc or  $t$ -test for positive controls).

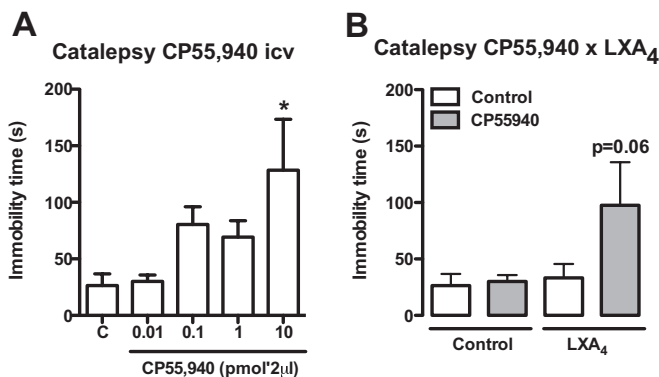

**Fig. 54.** LXA<sub>4</sub> also potentiates CP55,940-induced catalepsy. (A) Dose–response curve for the cataleptic effect of CP55,940 via i.c.v. route. This experiment defined the subdose used to investigate whether LXA<sub>4</sub> would potentiate this cannabinoid agonist. (B) The cannabinoid agonist CP55,940 (0.01 pmol/2  $\mu$ L, i.c.v.) was coinjected with LXA<sub>4</sub> (0.01 pmol/2  $\mu$ L, i.c.v.) or control (Ctrl) and tested in the catalepsy test 5 min later to confirm that LXA<sub>4</sub> also potentiates CP55,940-induced catalepsy. This result is in line with the experiment depicted in Fig. 4B showing that LXA<sub>4</sub> increases the affinity of [<sup>3</sup>H]CP55,940 for the CB<sub>1</sub> receptor in mouse brain membranes. Data are represented as mean  $\pm$  SEM. \* $P < 0.05$  vs. Control (C);  $P < 0.06$  vs. C/CP55,940 (Duncan's post hoc).
